# Supplementary material for: Hot Spot Analysis of YAP-TEAD Protein-Protein Interaction Using the Fragment Molecular Orbital Method and Its Application for Inhibitor Discovery
Source: MDPI journal article supplement (doi:10.3390/cancers13164246), 2021-08-23
Supplement: s1 [file s1]

# Supplementary Material: Hot Spot Analysis of YAP-TEAD Protein-Protein Interaction Using the Fragment Molecular Orbital Method and Its Application for Inhibitor Discovery

Jongwan Kim, Hocheol Lim, Sungho Moon, Seon-Yeon Cho, Min Hye Kim, Jae Hyung Park, Hyun Woo Park and Kyoung Tai No

## Supplement Methods

### Wound healing assay

A375 cells were incubated in 24-well plates and cultured until full confluency. Cells were scratched by 200- $\mu$ l pipette tip and then washed with media to remove cell debris, and the media was replaced. Photographs of the wound region were taken at 0 and 48 h. Cell free area was measured using TScratch software [1].

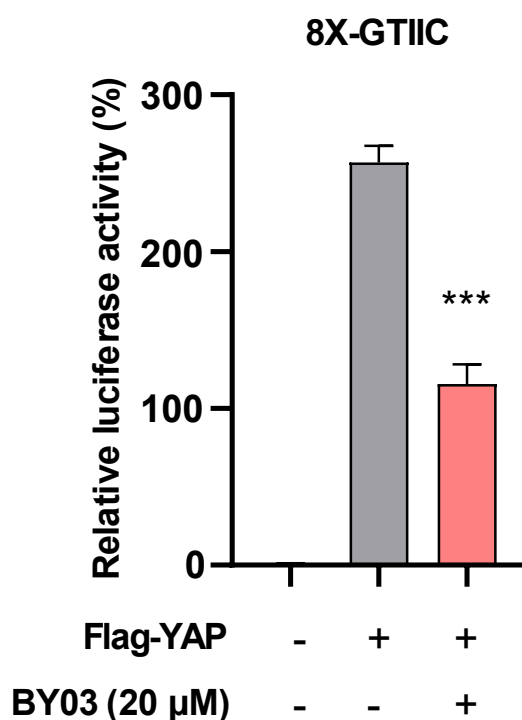

**Figure S1.** BY03 negative regulates YAP-dependent TEAD activity. TEAD reporter luciferase activity observed in HEK293T cells treated with 20  $\mu$ M of BY03 with overexpression of YAP-S127A at 24 h post-transfection.

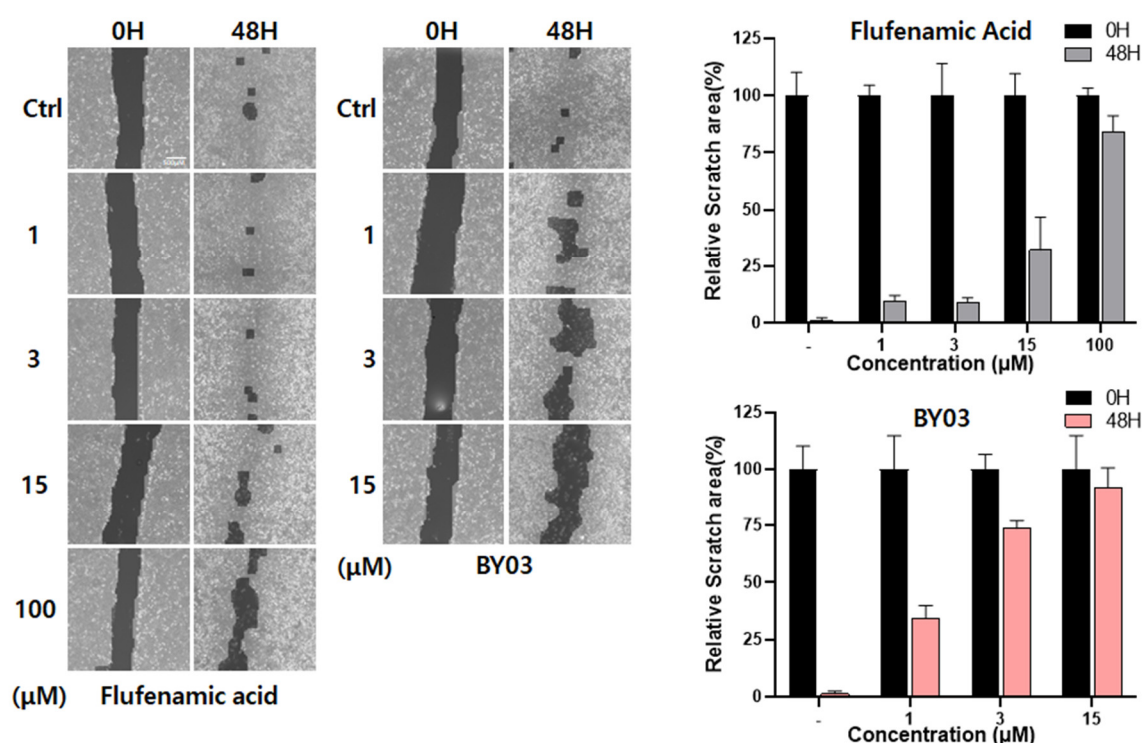

**Figure S2.** BY03 attenuates cancer cell migration. Wound-healing assay for migration of FA or BY03 treatment and the wounded areas after 0 and 48h were measured by using the TScratch program (left panel). Graphs show relative values of unfilled areas and average values from a representative of multiple experiments performed in triplicate (right panel). Scale bar: 500 μm.

**Table S1.** PIEDA of YAP/TEAD1-IF2 complex (PDB ID: 3KYS).

| YAP    | TEAD1  | PIE     | $\Delta E_{es}$ | $\Delta E_{ex}$ | $\Delta E_{ct+mix}$ | $\Delta E_{di}$ | $\Delta G_{sol}$ |
|--------|--------|---------|-----------------|-----------------|---------------------|-----------------|------------------|
| GLN053 | GLU323 | -8.729  | -1.046          | 0.974           | -1.279              | -2.666          | -4.711           |
|        | PRO342 | -3.622  | -3.318          | 1.147           | -0.890              | -1.740          | 1.179            |
|        | MET343 | -6.501  | -5.282          | 0.320           | -0.733              | -1.057          | 0.250            |
| ILE054 | GLU323 | -18.893 | -15.645         | 2.155           | -1.787              | -3.002          | -0.614           |
| VAL055 | LYS321 | -10.195 | -7.009          | 4.551           | -2.807              | -4.100          | -0.830           |
|        | VAL322 | -15.344 | -17.188         | 6.964           | -1.551              | -3.435          | -0.134           |
| HIS056 | GLU320 | -18.294 | -16.495         | 1.771           | -2.341              | -3.849          | 2.620            |
|        | LYS321 | -10.482 | -12.686         | 8.840           | -2.650              | -3.701          | -0.287           |
| VAL057 | GLN317 | -4.189  | -4.725          | 0.002           | -0.127              | -0.225          | 0.887            |
|        | GLU320 | -6.909  | -8.873          | 4.047           | -0.084              | -2.752          | 0.752            |
|        | LYS321 | -5.261  | -3.958          | 0.000           | -0.111              | -0.378          | -0.814           |
| ARG058 | PHE314 | -7.616  | -7.177          | -0.001          | -0.092              | -0.094          | -0.252           |
|        | VAL318 | -19.979 | -20.965         | 3.719           | -2.540              | -5.252          | 5.059            |
|        | VAL319 | -9.985  | -9.641          | 2.720           | -0.529              | -3.168          | 0.634            |
| ASP064 | SER313 | -26.145 | -30.322         | 13.059          | -5.460              | -4.371          | 0.949            |
|        | VAL318 | -3.091  | -0.483          | 4.614           | -2.258              | -3.567          | -1.398           |
|        | TYR346 | -4.424  | -4.420          | 0.383           | -0.391              | -1.404          | 1.408            |
| LEU065 | TYR346 | -7.591  | -2.867          | 2.699           | -1.819              | -5.478          | -0.126           |
| GLU066 | LYS353 | -29.102 | -66.129         | 0.819           | -0.868              | -1.839          | 38.915           |
| LEU068 | PHE314 | -4.187  | -1.649          | 3.060           | -1.661              | -4.061          | 0.124            |
| PHE069 | LYS353 | -4.415  | -1.510          | 6.139           | -1.846              | -5.334          | -1.864           |
|        | VAL366 | -3.817  | -0.198          | 1.016           | -1.373              | -2.893          | -0.370           |
|        | ASN369 | -4.437  | -4.162          | -0.001          | -0.015              | -0.091          | -0.168           |

All energies are in kcal/mol. The calculation was conducted at FMO-MP2/6-31G\*\*/PCM level.

**Table S2.** PIEDA of YAP/TEAD1-IF3 complex (PDB ID: 3KYS).

| YAP    | TEAD1  | PIE     | $\Delta E^{\text{es}}$ | $\Delta E^{\text{ex}}$ | $\Delta E^{\text{ct+mix}}$ | $\Delta E^{\text{di}}$ | $\Delta G^{\text{sol}}$ |
|--------|--------|---------|------------------------|------------------------|----------------------------|------------------------|-------------------------|
| PRO081 | PHE314 | -3.688  | -1.507                 | 0.903                  | -0.777                     | -2.560                 | 0.253                   |
| THR083 | GLU368 | -7.008  | -3.879                 | -0.001                 | 0.016                      | 0.032                  | -3.175                  |
| VAL084 | ASP249 | -4.499  | -8.282                 | -0.001                 | -0.085                     | -0.156                 | 4.025                   |
| MET086 | GLU368 | -31.779 | -28.614                | 2.853                  | -4.385                     | -4.955                 | 3.321                   |
| ARG087 | GLU368 | -36.612 | -55.978                | 0.007                  | -0.502                     | -0.375                 | 20.236                  |
|        | GLU393 | -49.261 | -77.663                | 0.290                  | -2.093                     | -1.593                 | 31.798                  |
| ARG089 | GLN246 | -8.278  | -9.157                 | 0.218                  | -0.597                     | -1.364                 | 2.622                   |
|        | ILE247 | -28.389 | -26.897                | 3.414                  | -1.831                     | -3.238                 | 0.163                   |
|        | ASP249 | -98.352 | -132.793               | 44.817                 | -11.091                    | -7.788                 | 8.503                   |
|        | GLU368 | -47.110 | -51.853                | -0.001                 | 0.029                      | 0.031                  | 4.684                   |
| LYS090 | ASP243 | -20.327 | -40.835                | 0.000                  | 0.000                      | 0.000                  | 20.508                  |
|        | GLN246 | -10.459 | -4.163                 | 4.529                  | -1.904                     | -4.580                 | -4.341                  |
| LEU091 | GLN246 | -6.043  | -4.770                 | 0.415                  | -0.949                     | -1.666                 | 0.928                   |
| PRO092 | GLU240 | -6.753  | -4.098                 | 0.687                  | -1.501                     | -1.745                 | -0.096                  |
| SER094 | GLU240 | -29.904 | -40.142                | 16.443                 | -7.010                     | -4.940                 | 5.744                   |
|        | TYR406 | -5.339  | -12.983                | 16.686                 | -4.877                     | -4.309                 | 0.145                   |
| PHE095 | LYS274 | -7.356  | -3.740                 | 3.175                  | -1.682                     | -5.287                 | 0.178                   |
| PHE096 | LYS274 | -41.982 | -40.107                | 6.243                  | -2.974                     | -4.115                 | -1.030                  |
| PRO098 | TRP276 | -4.585  | -1.730                 | 7.484                  | -2.340                     | -7.833                 | -0.166                  |
|        | HIS404 | -5.389  | -5.439                 | 1.500                  | -1.375                     | -2.033                 | 1.958                   |
| PRO099 | TRP276 | -3.222  | -2.336                 | 0.686                  | 0.691                      | -1.935                 | -0.329                  |
|        | HIS404 | -3.699  | -8.042                 | 13.645                 | -3.149                     | -6.834                 | 0.681                   |
| GLU100 | GLN402 | -6.270  | 0.424                  | 0.240                  | -0.559                     | -1.044                 | -5.331                  |

All energies are in kcal/mol. The calculation was conducted at FMO-MP2/6-31G\*\*/PCM level.

**Table S3.** PIEDA of BY03 and TEAD1 complex.

| BY03   | Total   | ES      | EX    | CT     | DI     | SL     |
|--------|---------|---------|-------|--------|--------|--------|
| SER313 | -3.215  | -1.384  | 3.698 | -1.524 | -3.817 | -0.188 |
| LYS316 | -3.056  | 3.233   | 0     | 0      | 0      | -6.289 |
| TYR346 | -8.346  | -2.109  | 5.063 | -2.185 | -8.768 | -0.347 |
| MET347 | -5.701  | -4.499  | 1.441 | -1.011 | -1.899 | 0.267  |
| LYS353 | -49.137 | -46.843 | 7.541 | -4.048 | -9.278 | 3.491  |
| LEU354 | -4.123  | -1.115  | 0.548 | -0.976 | -2.271 | -0.309 |
| LYS355 | -3.121  | -0.477  | 0.001 | 0.041  | -0.158 | -2.527 |
| VAL366 | -4.797  | -1.583  | 2.07  | -0.977 | -4.549 | 0.242  |
| PHE370 | -4.935  | -3.149  | 3.802 | -1.545 | -4.448 | 0.404  |

Table S3: PIE for BY03 bindings to TEAD1. All energies are in kcal/mol. The calculation was conducted at FMO-MP2/6-31G\*\*/PCM level.

**Table S4.** PIEDA of BY01 and TEAD1 complex.

| BY01   | Total  | ES     | EX    | CT     | DI     | SL     |
|--------|--------|--------|-------|--------|--------|--------|
| SER313 | -3.256 | -2.66  | 3.545 | -1.111 | -3.08  | 0.051  |
| TYR346 | -6.453 | -2.229 | 0.987 | -1.195 | -3.717 | -0.3   |
| PHE350 | -6.545 | -2.138 | 4.805 | -2.292 | -7.112 | 0.192  |
| LYS353 | -7.821 | -6.73  | 8.469 | -2.648 | -8.252 | 1.34   |
| LEU354 | -3.315 | -0.235 | 1.431 | -0.912 | -3.069 | -0.529 |
| VAL366 | -6.299 | 0.117  | 4.812 | -1.929 | -8.267 | -1.033 |
| PHE370 | -6.599 | -4.732 | 4.919 | -1.324 | -5.452 | -0.01  |

Table S4: PIE for BY01 bindings to TEAD1. All energies are in kcal/mol. The calculation was conducted at FMO-MP2/6-31G\*\*/PCM level.

**Table S5.** PIEDA of BY02 and TEAD1 complex.

| BY02   | Total   | ES      | EX    | CT     | DI      | SL     |
|--------|---------|---------|-------|--------|---------|--------|
| SER313 | -9.402  | -6.959  | 4.157 | -1.834 | -4.233  | -0.534 |
| LYS316 | -6.182  | -3.318  | 0     | 0      | 0       | -2.865 |
| TYR346 | -19.112 | -11.561 | 9.457 | -4.203 | -12.483 | -0.322 |
| MET347 | -3.911  | -2.262  | 0.219 | -0.84  | -1.272  | 0.244  |
| PHE350 | -6.503  | -1.149  | 4.618 | -2.423 | -8.186  | 0.637  |
| LYS353 | -15.301 | -3.753  | 5.233 | -2.419 | -7.881  | -6.48  |
| LEU354 | -3.585  | -0.278  | 1.714 | -1.009 | -3.507  | -0.505 |
| VAL366 | -3.56   | -1.115  | 2.163 | -0.74  | -3.741  | -0.126 |
| LEU367 | -3.586  | -2.012  | 1.978 | -0.935 | -2.193  | -0.424 |

Table S5: PIE for BY02 bindings to TEAD1. All energies are in kcal/mol. The calculation was conducted at FMO-MP2/6-31G\*\*/PCM level.

## Reference

1. Gebäck, T.; Schulz, M.M.P.; Koumoutsakos, P.; Detmar, M. TScratch: a novel and simple software tool for automated analysis of monolayer wound healing assays. <https://doi.org/10.2144/000113083> **2018**, *46*, 265–274, doi:10.2144/000113083.
